# Supplementary material for: A Role for iNOS in Erastin Mediated Reduction of P-Glycoprotein Transport Activity
Source: MDPI journal article supplement (doi:10.3390/cancers16091733), 2024-04-29
Supplement: s1 [file s1]

**Supplementary Figure 1A - Full Western Blots used in Figure 4 in main text**

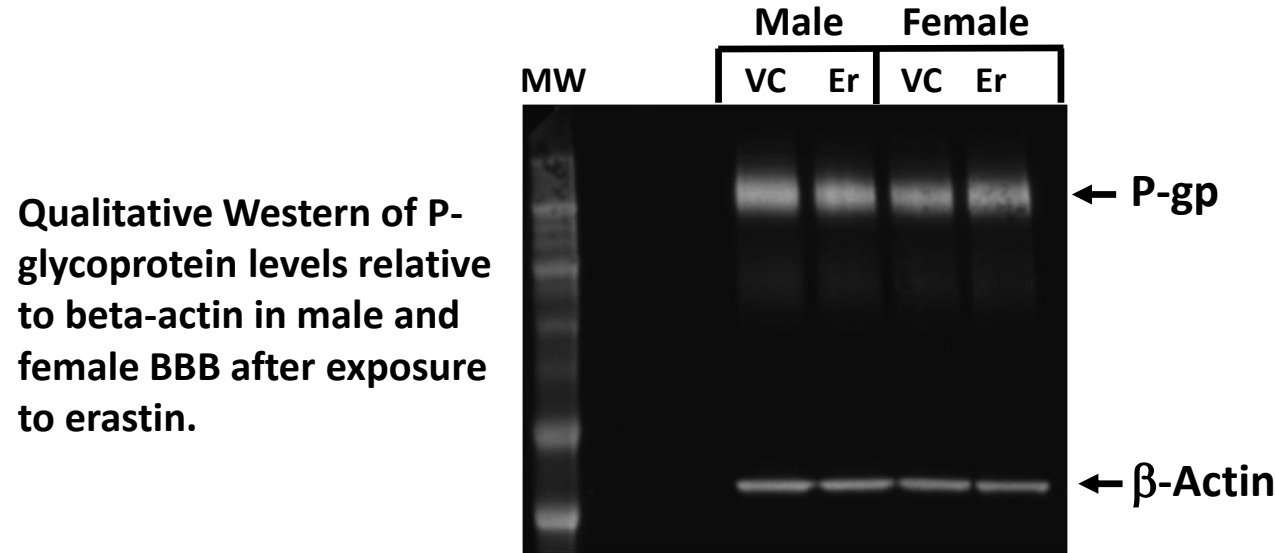

**Supplementary Figure 1B - Full Western Blots used in Figure 4 in main text**

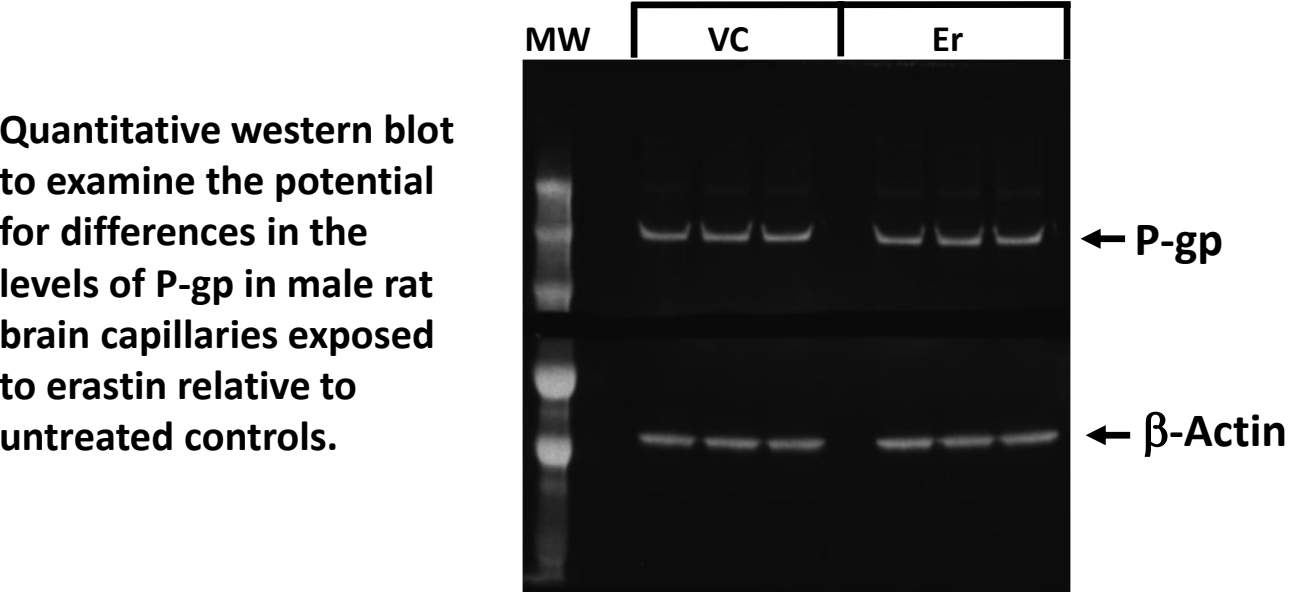

**Supplementary Figure S1C – Densitometry measurments of bands used in Figure 4C in main text**

| VC       |               |               | Er           |              |              |               |
|----------|---------------|---------------|--------------|--------------|--------------|---------------|
| P-gp →   | 1657 x (1.03) | 1662 x (1.03) | 1786 x (1.0) | 1673 x (1.0) | 1659 x (1.1) | 1683 x (1.13) |
| β-Actin→ | 2045          | 2050          | 2102         | 2147         | 1953         | 1902          |

Quantitation of western blot above: P-glycoprotein levels in male brain capillaries normalized ( ) to beta-actin levels after exposure to erastin.

## Supplementary Figure 2 C and D.

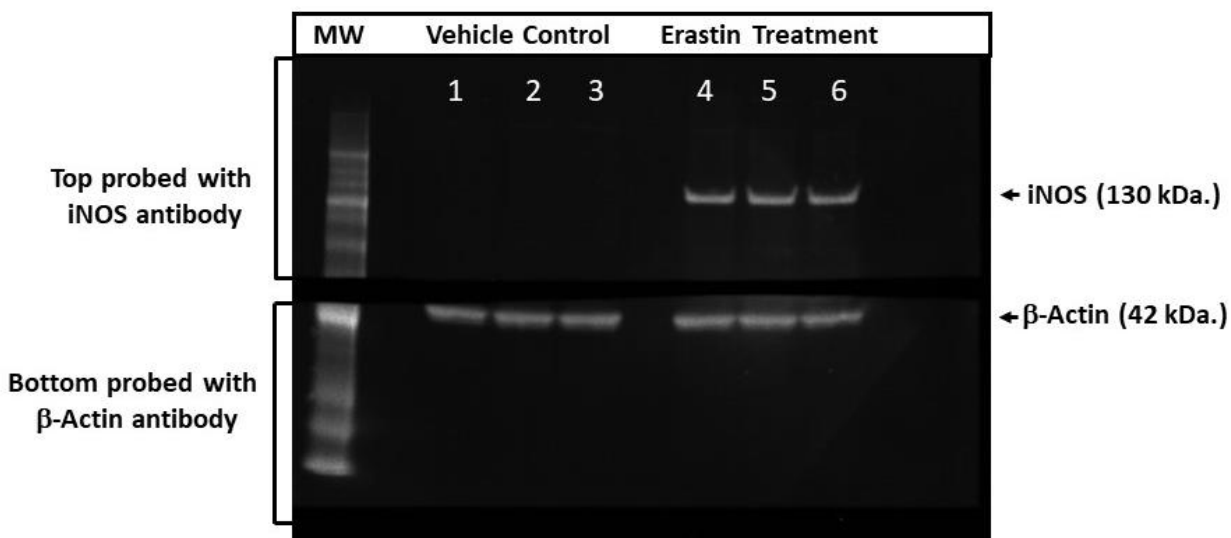

Western blot of iNOS (top) and  $\beta$ -Actin (bottom) protein levels measured in rat brain capillaries in triplicate. This blot was used for the **Figure 6 (C & D)** in the main text to quantitate levels of each respective protein.
